# Supplementary material
Source: publisher site journal article supplement (https://cdn.jamanetwork.com/ama/content_public/journal/intemed/25460/ioi120059_supp.pdf)
Supplement: Supplementary file 1 [file ioi120059_supp.pdf]

## Supplementary Online Content

Toh S, Reichman ME, Houstoun M. Comparative risk for angioedema associated with the use of drugs that target the renin-angiotensin-aldosterone system. *Arch Intern Med*. Published online October 15, 2012. doi:10.1001/2013.jamainternmed.34

**eTable 1.** Number of Patients Censored by Reason by Drug Class

**eTable 2.** Comparison of Results Obtained From the Case-Centered Logistic Regression Approach and Meta-analysis Over a Maximal Follow-up Period of 365 Days, 2001-2010

**eTable 3.** Results by Study Drug Over a Maximal Follow-up Period of 365 Days, Using a 365-Day Look-Back Period, 2001-2010

**eTable 4.** Results by Study Drug Over a Maximal Follow-up Period of 365 Days, Restricting to Angioedema Events Observed During an Inpatient or Emergency Department Encounter, 2001-2010

**eTable 5.** Results by Study Drug Over a Maximal Follow-up Period of 365 Days, Restricting to the Study Period Following FDA Approval of Aliskiren (3/5/2007–12/31/2010)

**eTable 6.** Relative Risk of Angioedema Comparing ACEIs and  $\beta$ -Blockers With Additional Adjustment for Race

This supplementary material has been provided by the authors to give readers additional information about their work.

**eTable 1.** Number of Patients Censored by Reason by Drug Class

| <b>Reason</b>                                        | <b>ACEIs</b>      | <b>ARBs</b>     | <b>Aliskiren</b> | <b>β-blockers</b> |
|------------------------------------------------------|-------------------|-----------------|------------------|-------------------|
| Death                                                | 6,195 (0.3%)      | 1,000 (0.2%)    | 4 (0.1%)         | 10,187 (0.6%)     |
| End of health plan enrollment                        | 267,365 (14.5%)   | 68,375 (14.6%)  | 820 (16.8%)      | 178,214 (11.2%)   |
| End of first treatment episode                       | 1,064,534 (57.7%) | 291,248 (62.3%) | 2,945 (60.5%)    | 1,046,812 (65.7%) |
| Switching to another study drug of a different class | 193,913 (10.5%)   | 39,645 (8.5%)   | 646 (13.3%)      | 143,998 (9.0%)    |
| End of 365 days of follow-up                         | 309,830 (16.8%)   | 66,757 (14.3%)  | 445 (9.1%)       | 212,152 (13.3%)   |

Abbreviations: ACEIs, angiotensin converting enzyme inhibitors; ARBs, angiotensin receptor blockers.

**eTable 2.** Comparison of Results Obtained From the Case-Centered Logistic Regression Approach and Meta-analysis Over a Maximal Follow-up Period of 365 Days, 2001-2010

| Drug                      | Site-adjusted HR (95% CI) |                                         | Propensity score-adjusted HR (95% CI) |                                         |
|---------------------------|---------------------------|-----------------------------------------|---------------------------------------|-----------------------------------------|
|                           | Case-centered Approach    | Inverse Variance-Weighted Meta-analysis | Case-centered Approach                | Inverse Variance-Weighted Meta-analysis |
| <b>Angioedema</b>         |                           |                                         |                                       |                                         |
| ACEIs                     | 2.77 (2.57, 2.98)         | 2.70 (2.50, 2.90)                       | 3.04 (2.81, 3.27)                     | 2.98 (2.76, 3.21)                       |
| ARBs                      | 1.11 (0.97, 1.28)         | 1.15 (1.00, 1.32)                       | 1.16 (1.00, 1.34)                     | 1.15 (1.00, 1.33)                       |
| Candesartan               | 0.91 (0.34, 2.43)         | 1.03 (0.39, 2.77)                       | 0.95 (0.35, 2.55)                     | 1.08 (0.40, 2.89)                       |
| Eprosartan                | --                        | --                                      | --                                    | --                                      |
| Irbesartan                | 1.05 (0.70, 1.58)         | 1.17 (0.77, 1.75)                       | 1.11 (0.73, 1.67)                     | 1.18 (0.78, 1.78)                       |
| Losartan                  | 1.48 (1.20, 1.84)         | 1.56 (1.26, 1.93)                       | 1.53 (1.23, 1.90)                     | 1.52 (1.22, 1.89)                       |
| Olmesartan                | 0.84 (0.60, 1.16)         | 0.82 (0.59, 1.14)                       | 0.88 (0.63, 1.22)                     | 0.86 (0.62, 1.19)                       |
| Telmisartan               | 0.83 (0.45, 1.50)         | 0.99 (0.54, 1.80)                       | 0.86 (0.47, 1.56)                     | 0.98 (0.54, 1.79)                       |
| Valsartan                 | 1.04 (0.85, 1.28)         | 1.07 (0.87, 1.32)                       | 1.08 (0.88, 1.34)                     | 1.09 (0.89, 1.35)                       |
| Aliskiren                 | 2.75 (1.30, 5.81)         | 2.83 (1.34, 5.98)                       | 2.85 (1.34, 6.04)                     | 2.86 (1.35, 6.04)                       |
| <b>Serious angioedema</b> |                           |                                         |                                       |                                         |
| ACEIs                     | 4.42 (3.29, 5.96)         | 4.04 (2.99, 5.46)                       | 4.91 (3.62, 6.65)                     | 4.20 (3.08, 5.71)                       |
| ARBs                      | 0.52 (0.26, 1.05)         | 0.56 (0.28, 1.14)                       | 0.56 (0.28, 1.14)                     | 0.59 (0.28, 1.22)                       |
| Candesartan               | --                        | --                                      | --                                    | --                                      |
| Eprosartan                | --                        | --                                      | --                                    | --                                      |
| Irbesartan                | --                        | --                                      | --                                    | --                                      |
| Losartan                  | 0.97 (0.30, 3.18)         | 1.08 (0.33, 3.54)                       | 1.01 (0.31, 3.34)                     | 0.94 (0.28, 3.16)                       |
| Olmesartan                | 0.80 (0.10, 6.20)         | 0.67 (0.09, 5.13)                       | 0.83 (0.11, 6.57)                     | 0.80 (0.10, 6.36)                       |
| Telmisartan               | --                        | --                                      | --                                    | --                                      |
| Valsartan                 | 1.05 (0.43, 2.56)         | 1.23 (0.50, 3.03)                       | 1.14 (0.46, 2.82)                     | 1.31 (0.52, 3.31)                       |
| Aliskiren                 | 8.67 (1.11, 67.62)        | 7.04 (0.92, 54.20)                      | 8.84 (1.13, 69.41)                    | 8.53 (1.08, 67.41)                      |

Abbreviations: ACEIs, angiotensin converting enzyme inhibitors; ARBs, angiotensin receptor blockers; CI, confidence interval; HR, hazard ratio.

**eTable 3.** Results by Study Drug Over a Maximal Follow-up Period of 365 Days, Using a 365-Day Look-Back Period, 2001-2010

| Drug                      | Number of Events | Persons   | Person-years | Cumulative Incidence Per 1,000 Persons (95% CI) | Incidence rate per 1,000 Person-years (95% CI) | Site-Adjusted HR (95% CI)* | Propensity Score-Adjusted HR (95% CI)* |
|---------------------------|------------------|-----------|--------------|-------------------------------------------------|------------------------------------------------|----------------------------|----------------------------------------|
| <b>Angioedema</b>         |                  |           |              |                                                 |                                                |                            |                                        |
| ACEIs                     | 2,623            | 1,392,602 | 584,873      | 1.88 (1.81, 1.96)                               | 4.49 (4.32, 4.66)                              | 3.04 (2.79, 3.31)          | 3.36 (3.07, 3.67)                      |
| ARBs                      | 181              | 312,826   | 119,234      | 0.58 (0.50, 0.67)                               | 1.52 (1.31, 1.76)                              | 1.12 (0.94, 1.34)          | 1.21 (1.01, 1.45)                      |
| Candesartan               | 2                | 7,754     | 2,683        | 0.26 (0.03, 0.93)                               | 0.75 (0.09, 2.69)                              | 0.79 (0.20, 3.20)          | 0.87 (0.22, 3.50)                      |
| Eprosartan                | 0                | 609       | 211          | --                                              | --                                             | --                         | --                                     |
| Irbesartan                | 12               | 27,845    | 10,261       | 0.43 (0.22, 0.75)                               | 1.17 (0.60, 2.04)                              | 0.96 (0.54, 1.71)          | 1.04 (0.58, 1.86)                      |
| Losartan                  | 62               | 73,600    | 29,432       | 0.84 (0.65, 1.08)                               | 2.11 (1.62, 2.70)                              | 1.49 (1.14, 1.94)          | 1.57 (1.20, 2.05)                      |
| Olmesartan                | 22               | 61,936    | 20,468       | 0.36 (0.22, 0.54)                               | 1.08 (0.67, 1.63)                              | 0.79 (0.51, 1.23)          | 0.85 (0.55, 1.31)                      |
| Telmisartan               | 6                | 17,743    | 5,612        | 0.34 (0.12, 0.74)                               | 1.07 (0.39, 2.33)                              | 0.80 (0.36, 1.79)          | 0.86 (0.38, 1.93)                      |
| Valsartan                 | 73               | 123,339   | 47,883       | 0.59 (0.46, 0.74)                               | 1.53 (1.20, 1.92)                              | 1.12 (0.86, 1.44)          | 1.18 (0.91, 1.53)                      |
| Aliskiren                 | 3                | 3,260     | 1,034        | 0.92 (0.19, 2.69)                               | 2.90 (0.60, 8.48)                              | 3.68 (1.18, 11.51)         | 4.01 (1.28, 12.57)                     |
| β-blockers                | 655              | 1,185,727 | 419,639      | 0.55 (0.51, 0.60)                               | 1.56 (1.44, 1.69)                              | Referent                   | Referent                               |
| <b>Serious Angioedema</b> |                  |           |              |                                                 |                                                |                            |                                        |
| ACEIs                     | 246              | 1,392,602 | 585,257      | 0.18 (0.16, 0.20)                               | 0.42 (0.37, 0.48)                              | 5.05 (3.50, 7.29)          | 5.56 (3.83, 8.09)                      |
| ARBs                      | 9                | 312,826   | 119,280      | 0.03 (0.01, 0.06)                               | 0.08 (0.04, 0.14)                              | 0.81 (0.37, 1.78)          | 0.87 (0.39, 1.91)                      |
| Candesartan               | 0                | 7,754     | 2,683        | --                                              | --                                             | --                         | --                                     |
| Eprosartan                | 0                | 609       | 211          | --                                              | --                                             | --                         | --                                     |
| Irbesartan                | 0                | 27,845    | 10,264       | --                                              | --                                             | --                         | --                                     |
| Losartan                  | 2                | 73,600    | 29,449       | 0.03 (0.00, 0.10)                               | 0.07 (0.01, 0.25)                              | 1.20 (0.28, 5.25)          | 1.23 (0.28, 5.45)                      |
| Olmesartan                | 1                | 61,936    | 20,473       | 0.02 (0.00, 0.09)                               | 0.05 (0.00, 0.27)                              | 1.47 (0.17, 12.84)         | 1.47 (0.17, 12.87)                     |
| Telmisartan               | 0                | 17,743    | 5,613        | --                                              | --                                             | --                         | --                                     |
| Valsartan                 | 6                | 123,339   | 47,900       | 0.05 (0.02, 0.11)                               | 0.13 (0.05, 0.27)                              | 1.75 (0.69, 4.44)          | 1.94 (0.75, 5.02)                      |
| Aliskiren                 | 0                | 3,260     | 1,035        | --                                              | --                                             | --                         | --                                     |
| β-blockers                | 33               | 1,185,727 | 419,837      | 0.03 (0.02, 0.04)                               | 0.08 (0.05, 0.11)                              | Referent                   | Referent                               |

Abbreviations: ACEIs, angiotensin converting enzyme inhibitors; ARBs, angiotensin receptor blockers; CI, confidence interval; HR, hazard ratio.

\*From the case-centered logistic regression approach.

**eTable 4.** Results by Study Drug Over a Maximal Follow-up Period of 365 Days, Restricting to Angioedema Events Observed During an Inpatient or Emergency Department Encounter, 2001-2010

| Drug        | Number of events | Exposed persons | Exposed person-years | Cumulative incidence per 1,000 persons (95% CI) | Incidence rate per 1,000 person-years (95% CI) | Site-adjusted HR (95% CI)* | Propensity score-adjusted HR (95% CI)* |
|-------------|------------------|-----------------|----------------------|-------------------------------------------------|------------------------------------------------|----------------------------|----------------------------------------|
| ACEIs       | 1,782            | 1,845,138       | 753,386              | 0.97 (0.92, 1.01)                               | 2.37 (2.26, 2.48)                              | 4.87 (4.29, 5.52)          | 5.34 (4.69, 6.07)                      |
| ARBs        | 83               | 467,313         | 173,496              | 0.18 (0.14, 0.22)                               | 0.48 (0.38, 0.59)                              | 0.99 (0.76, 1.29)          | 1.09 (0.83, 1.42)                      |
| Candesartan | 0                | 12,286          | 4,178                | --                                              | --                                             | --                         | --                                     |
| Eprosartan  | 0                | 1,165           | 392                  | --                                              | --                                             | --                         | --                                     |
| Irbesartan  | 7                | 44,094          | 16,001               | 0.16 (0.06, 0.33)                               | 0.44 (0.18, 0.90)                              | 1.00 (0.47, 2.14)          | 1.13 (0.53, 2.44)                      |
| Losartan    | 26               | 106,522         | 41,250               | 0.24 (0.16, 0.36)                               | 0.63 (0.41, 0.92)                              | 1.43 (0.95, 2.16)          | 1.54 (1.02, 2.33)                      |
| Olmesartan  | 8                | 92,973          | 30,179               | 0.09 (0.04, 0.17)                               | 0.27 (0.11, 0.52)                              | 0.52 (0.25, 1.05)          | 0.57 (0.28, 1.17)                      |
| Telmisartan | 4                | 26,530          | 8,180                | 0.15 (0.04, 0.39)                               | 0.49 (0.13, 1.25)                              | 0.97 (0.36, 2.62)          | 1.10 (0.41, 2.99)                      |
| Valsartan   | 38               | 183,743         | 69,417               | 0.21 (0.15, 0.28)                               | 0.55 (0.39, 0.75)                              | 1.05 (0.74, 1.49)          | 1.16 (0.81, 1.67)                      |
| Aliskiren   | 2                | 4,867           | 1,499                | 0.41 (0.05, 1.48)                               | 1.33 (0.16, 4.82)                              | 2.49 (0.61, 10.09)         | 2.72 (0.67, 11.07)                     |
| β-blockers  | 282              | 1,592,278       | 548,885              | 0.18 (0.16, 0.20)                               | 0.51 (0.46, 0.58)                              | Referent                   | Referent                               |

Abbreviations: ACEIs, angiotensin converting enzyme inhibitors; ARBs, angiotensin receptor blockers; CI, confidence interval; HR, hazard ratio.

\*From the case-centered logistic regression approach.

**eTable 5.** Results by Study Drug Over a Maximal Follow-up Period of 365 Days, Restricting to the Study Period Following FDA Approval of Aliskiren (3/5/2007–12/31/2010)

| Drug                      | Number of events | Persons   | Person-years | Cumulative incidence per 1,000 persons (95% CI) | Incidence rate per 1,000 person-years (95% CI) | Site-adjusted HR (95% CI)* | Propensity score-adjusted HR (95% CI)* |
|---------------------------|------------------|-----------|--------------|-------------------------------------------------|------------------------------------------------|----------------------------|----------------------------------------|
| <b>Angioedema</b>         |                  |           |              |                                                 |                                                |                            |                                        |
| ACEIs                     | 1,951            | 1,083,869 | 406,278      | 1.80 (1.72, 1.88)                               | 4.80 (4.59, 5.02)                              | 2.70 (2.44, 2.98)          | 2.94 (2.65, 3.27)                      |
| ARBs                      | 175              | 269,549   | 91,542       | 0.65 (0.56, 0.75)                               | 1.91 (1.64, 2.23)                              | 1.09 (0.91, 1.31)          | 1.17 (0.97, 1.41)                      |
| Candesartan               | 2                | 5,178     | 1,693        | 0.39 (0.05, 1.40)                               | 1.18 (0.14, 4.27)                              | 1.14 (0.28, 4.60)          | 1.24 (0.31, 4.99)                      |
| Eprosartan                | 0                | 135       | 48           | --                                              | --                                             | --                         | --                                     |
| Irbesartan                | 11               | 22,228    | 7,446        | 0.50 (0.25, 0.89)                               | 1.48 (0.74, 2.64)                              | 0.92 (0.50, 1.67)          | 0.97 (0.53, 1.78)                      |
| Losartan                  | 61               | 57,130    | 19,761       | 1.07 (0.82, 1.37)                               | 3.09 (2.36, 3.97)                              | 1.66 (1.27, 2.18)          | 1.76 (1.33, 2.32)                      |
| Olmesartan                | 28               | 63,351    | 19,420       | 0.44 (0.29, 0.64)                               | 1.44 (0.96, 2.08)                              | 0.82 (0.56, 1.20)          | 0.87 (0.59, 1.29)                      |
| Telmisartan               | 6                | 17,643    | 5,180        | 0.34 (0.13, 0.74)                               | 1.16 (0.43, 2.52)                              | 0.64 (0.29, 1.44)          | 0.68 (0.30, 1.52)                      |
| Valsartan                 | 65               | 103,884   | 36,442       | 0.63 (0.48, 0.80)                               | 1.78 (1.38, 2.27)                              | 1.00 (0.76, 1.31)          | 1.07 (0.81, 1.41)                      |
| Aliskiren                 | 7                | 4,867     | 1,498        | 1.44 (0.58, 2.96)                               | 4.67 (1.88, 9.63)                              | 2.68 (1.26, 5.68)          | 2.83 (1.33, 6.00)                      |
| β-blockers                | 467              | 811,257   | 245,174      | 0.58 (0.53, 0.63)                               | 1.91 (1.74, 2.09)                              | Referent                   | Referent                               |
| <b>Serious Angioedema</b> |                  |           |              |                                                 |                                                |                            |                                        |
| ACEIs                     | 224              | 1,083,869 | 406,539      | 0.21 (0.18, 0.24)                               | 0.55 (0.48, 0.63)                              | 3.93 (2.74, 5.63)          | 4.40 (2.74, 5.63)                      |
| ARBs                      | 7                | 269,549   | 91,584       | 0.03 (0.01, 0.05)                               | 0.08 (0.03, 0.16)                              | 0.55 (0.24, 1.28)          | 0.58 (0.25, 1.35)                      |
| Candesartan               | 0                | 5,178     | 1,694        | --                                              | --                                             | --                         | --                                     |
| Eprosartan                | 0                | 135       | 48           | --                                              | --                                             | --                         | --                                     |
| Irbesartan                | 0                | 22,228    | 7,448        | --                                              | --                                             | --                         | --                                     |
| Losartan                  | 3                | 57,130    | 19,776       | 0.05 (0.01, 0.15)                               | 0.15 (0.03, 0.44)                              | 1.37 (0.41, 4.55)          | 1.34 (0.40, 4.49)                      |
| Olmesartan                | 1                | 63,351    | 19,427       | 0.03 (0.00, 0.09)                               | 0.05 (0.00, 0.29)                              | 0.80 (0.10, 6.20)          | 0.83 (0.11, 6.57)                      |
| Telmisartan               | 0                | 17,643    | 5,181        | --                                              | --                                             | --                         | --                                     |
| Valsartan                 | 3                | 103,884   | 36,457       | 0.03 (0.01, 0.08)                               | 0.08 (0.03, 0.24)                              | 1.15 (0.33, 4.00)          | 1.21 (0.34, 4.27)                      |
| Aliskiren                 | 1                | 4,867     | 1,499        | 0.21 (0.01, 1.14)                               | 0.67 (0.03, 3.72)                              | 8.67 (1.11, 67.62)         | 8.84 (1.13, 69.41)                     |
| β-blockers                | 35               | 811,257   | 245,297      | 0.04 (0.03, 0.06)                               | 0.14 (0.20, 0.20)                              | Referent                   | Referent                               |

Abbreviations: ACEIs, angiotensin converting enzyme inhibitors; ARBs, angiotensin receptor blockers; CI, confidence interval; HR, hazard ratio.

\*From the case-centered logistic regression approach.

**eTable 6.** Relative Risk of Angioedema Comparing ACEIs and  $\beta$ -Blockers With Additional Adjustment for Race

| Observed Adjusted Relative Risk in the Current Study | Relative Risk Between African American Race and Angioedema | Prevalence of African American Race Among ACEI Initiators | Prevalence of African American Race Among $\beta$ -Blocker Initiators* | Relative Risk With Additional Adjustment for African American Race |
|------------------------------------------------------|------------------------------------------------------------|-----------------------------------------------------------|------------------------------------------------------------------------|--------------------------------------------------------------------|
| 3.04                                                 | 1.00                                                       | 0.00                                                      | 0.13                                                                   | 3.04                                                               |
| 3.04                                                 | 1.50                                                       | 0.00                                                      | 0.13                                                                   | 3.23                                                               |
| 3.04                                                 | 2.00                                                       | 0.00                                                      | 0.13                                                                   | 3.42                                                               |
| 3.04                                                 | 2.50                                                       | 0.00                                                      | 0.13                                                                   | 3.61                                                               |
| 3.04                                                 | 3.00                                                       | 0.00                                                      | 0.13                                                                   | 3.81                                                               |
| 3.04                                                 | 3.50                                                       | 0.00                                                      | 0.13                                                                   | 4.00                                                               |
| 3.04                                                 | 4.00                                                       | 0.00                                                      | 0.13                                                                   | 4.19                                                               |
| 3.04                                                 | 4.50                                                       | 0.00                                                      | 0.13                                                                   | 4.38                                                               |
| 3.04                                                 | 5.00                                                       | 0.00                                                      | 0.13                                                                   | 4.57                                                               |
| 3.04                                                 | 5.50                                                       | 0.00                                                      | 0.13                                                                   | 4.76                                                               |
| 3.04                                                 | 1.00                                                       | 0.03                                                      | 0.13                                                                   | 3.04                                                               |
| 3.04                                                 | 1.50                                                       | 0.03                                                      | 0.13                                                                   | 3.18                                                               |
| 3.04                                                 | 2.00                                                       | 0.03                                                      | 0.13                                                                   | 3.32                                                               |
| 3.04                                                 | 2.50                                                       | 0.03                                                      | 0.13                                                                   | 3.46                                                               |
| 3.04                                                 | 3.00                                                       | 0.03                                                      | 0.13                                                                   | 3.59                                                               |
| 3.04                                                 | 3.50                                                       | 0.03                                                      | 0.13                                                                   | 3.72                                                               |
| 3.04                                                 | 4.00                                                       | 0.03                                                      | 0.13                                                                   | 3.84                                                               |
| 3.04                                                 | 4.50                                                       | 0.03                                                      | 0.13                                                                   | 3.96                                                               |
| 3.04                                                 | 5.00                                                       | 0.03                                                      | 0.13                                                                   | 4.08                                                               |
| 3.04                                                 | 5.50                                                       | 0.03                                                      | 0.13                                                                   | 4.20                                                               |
| 3.04                                                 | 1.00                                                       | 0.06                                                      | 0.13                                                                   | 3.04                                                               |
| 3.04                                                 | 1.50                                                       | 0.06                                                      | 0.13                                                                   | 3.14                                                               |
| 3.04                                                 | 2.00                                                       | 0.06                                                      | 0.13                                                                   | 3.23                                                               |
| 3.04                                                 | 2.50                                                       | 0.06                                                      | 0.13                                                                   | 3.32                                                               |
| 3.04                                                 | 3.00                                                       | 0.06                                                      | 0.13                                                                   | 3.40                                                               |
| 3.04                                                 | 3.50                                                       | 0.06                                                      | 0.13                                                                   | 3.48                                                               |
| 3.04                                                 | 4.00                                                       | 0.06                                                      | 0.13                                                                   | 3.55                                                               |
| 3.04                                                 | 4.50                                                       | 0.06                                                      | 0.13                                                                   | 3.62                                                               |
| 3.04                                                 | 5.00                                                       | 0.06                                                      | 0.13                                                                   | 3.69                                                               |
| 3.04                                                 | 5.50                                                       | 0.06                                                      | 0.13                                                                   | 3.75                                                               |
| 3.04                                                 | 1.00                                                       | 0.09                                                      | 0.13                                                                   | 3.04                                                               |

|      |      |      |      |      |
|------|------|------|------|------|
| 3.04 | 1.50 | 0.09 | 0.13 | 3.09 |
| 3.04 | 2.00 | 0.09 | 0.13 | 3.14 |
| 3.04 | 2.50 | 0.09 | 0.13 | 3.18 |
| 3.04 | 3.00 | 0.09 | 0.13 | 3.23 |
| 3.04 | 3.50 | 0.09 | 0.13 | 3.26 |
| 3.04 | 4.00 | 0.09 | 0.13 | 3.30 |
| 3.04 | 4.50 | 0.09 | 0.13 | 3.33 |
| 3.04 | 5.00 | 0.09 | 0.13 | 3.36 |
| 3.04 | 5.50 | 0.09 | 0.13 | 3.39 |
| 3.04 | 1.00 | 0.00 | 0.13 | 3.04 |
| 3.04 | 1.50 | 0.00 | 0.13 | 3.23 |
| 3.04 | 1.00 | 0.13 | 0.13 | 3.04 |
| 3.04 | 1.50 | 0.13 | 0.13 | 3.04 |
| 3.04 | 2.00 | 0.13 | 0.13 | 3.04 |
| 3.04 | 2.50 | 0.13 | 0.13 | 3.04 |
| 3.04 | 3.00 | 0.13 | 0.13 | 3.04 |
| 3.04 | 3.50 | 0.13 | 0.13 | 3.04 |
| 3.04 | 4.00 | 0.13 | 0.13 | 3.04 |
| 3.04 | 4.50 | 0.13 | 0.13 | 3.04 |
| 3.04 | 5.00 | 0.13 | 0.13 | 3.04 |

Reference: Schneeweiss S. Sensitivity analysis and external adjustment for unmeasured confounders in epidemiologic database studies of therapeutics. *Pharmacoepidemiol Drug Saf.* 2006;15(5):291-303.

\*Assuming the prevalence of African American race among  $\beta$ -blocker initiators is the same as the prevalence of the U.S. general population based on 2010 U.S. Census data (<http://www.census.gov/prod/cen2010/briefs/c2010br-02.pdf>).
